# Supplementary material for: Hematological Ratios Are Associated with Acute Kidney Injury and Mortality in Patients That Present with Suspected Infection at the Emergency Department
Source: MDPI journal article supplement (doi:10.3390/jcm11041017), 2022-02-16
Supplement: s1 [file s1]

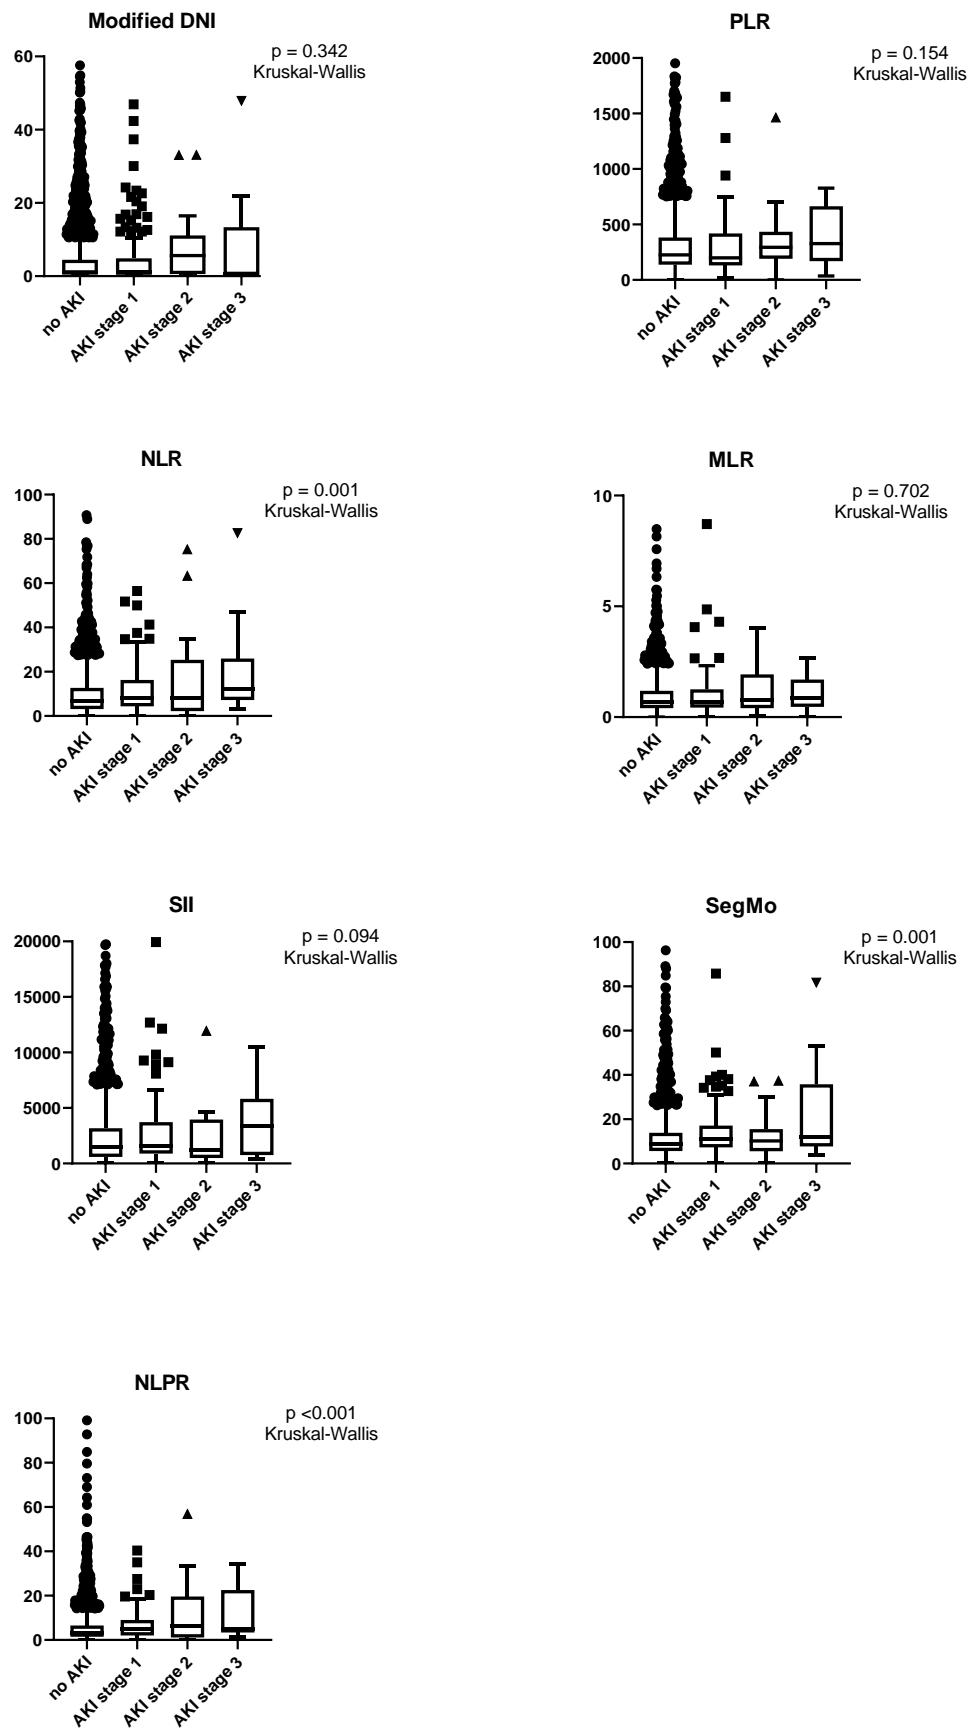

Figure S1. Distribution of hematological ratios after stratification for AKI stage.

**Table S1.** HRs (95% CI) for AKI <14 days after ED presentation.

| Ratios                         | Univariate             | Multivariate                                     |                                                  |                                                  |                                                  |
|--------------------------------|------------------------|--------------------------------------------------|--------------------------------------------------|--------------------------------------------------|--------------------------------------------------|
|                                | Crude HR<br>(95% CI)   | Adjusted HR:<br>Model 1 <sup>a</sup> (95%<br>CI) | Adjusted HR:<br>Model 2 <sup>b</sup> (95%<br>CI) | Adjusted HR:<br>Model 3 <sup>c</sup> (95%<br>CI) | Adjusted HR:<br>Model 4 <sup>d</sup> (95%<br>CI) |
| <b>Modified DNI</b>            |                        |                                                  |                                                  |                                                  |                                                  |
| Tertile 1, ≤ 0.5931            | 1.0 (reference)        | 1.0 (reference)                                  | 1.0 (reference)                                  | 1.0 (reference)                                  | 1.0 (reference)                                  |
| Tertile 2, 0.5931 - 2.7088     | <b>0.6 (0.4 - 0.9)</b> | <b>0.6 (0.4 - 1.0)</b>                           |
| Tertile 3, > 2.7088            | 0.9 (0.6 - 1.4)        | 0.9 (0.6 - 1.4)                                  | 0.9 (0.6 - 1.3)                                  | 0.9 (0.6 - 1.3)                                  | 0.8 (0.6 - 1.3)                                  |
| <b>NLR</b>                     |                        |                                                  |                                                  |                                                  |                                                  |
| Tertile 1, ≤4.2805             | 1.0 (reference)        | 1.0 (reference)                                  | 1.0 (reference)                                  | 1.0 (reference)                                  | 1.0 (reference)                                  |
| Tertile 2, 4.2805 - 10.2276    | <b>1.7 (1.1 - 2.8)</b> | <b>1.7 (1.0 - 2.7)</b>                           | <b>1.7 (1.0 - 2.7)</b>                           | 1.6 (1.0 - 2.7)                                  | 1.6 (0.9 - 2.6)                                  |
| Tertile 3, >10.2276            | <b>2.6 (1.6 - 4.1)</b> | <b>2.4 (1.5 - 3.9)</b>                           | <b>2.3 (1.4 - 3.7)</b>                           | <b>2.3 (1.4 - 3.6)</b>                           | <b>2.1 (1.3 - 3.5)</b>                           |
| <b>MLR</b>                     |                        |                                                  |                                                  |                                                  |                                                  |
| Tertile 1, ≤0.5057             | 1.0 (reference)        | 1.0 (reference)                                  | 1.0 (reference)                                  | 1.0 (reference)                                  | 1.0 (reference)                                  |
| Tertile 2, 0.5057 - 0.9830     | 1.2 (0.8 - 1.8)        | 1.1 (0.7 - 1.7)                                  | 1.1 (0.7 - 1.7)                                  | 1.1 (0.7 - 1.7)                                  | 1.0 (0.7 - 1.6)                                  |
| Tertile 3, >0.9830             | 1.2 (0.8 - 1.9)        | 1.1 (0.7 - 1.7)                                  | 1.1 (0.7 - 1.8)                                  | 1.1 (0.7 - 1.7)                                  | 1.1 (0.7 - 1.7)                                  |
| <b>SMR</b>                     |                        |                                                  |                                                  |                                                  |                                                  |
| Tertile 1, ≤ 6.7500            | 1.0 (reference)        | 1.0 (reference)                                  | 1.0 (reference)                                  | 1.0 (reference)                                  | 1.0 (reference)                                  |
| Tertile 2, 6.7500 - 11.9633    | <b>1.7 (1.0 - 2.7)</b> | 1.6 (1.0 - 2.6)                                  | 1.6 (1.0 - 2.6)                                  | 1.6 (1.0 - 2.6)                                  | 1.5 (0.9 - 2.4)                                  |
| Tertile 3, >11.9633            | <b>2.4 (1.5 - 3.9)</b> | <b>2.4 (1.5 - 3.8)</b>                           | <b>2.3 (1.4 - 3.7)</b>                           | <b>2.2 (1.4 - 3.6)</b>                           | <b>2.1 (1.3 - 3.4)</b>                           |
| <b>PLR</b>                     |                        |                                                  |                                                  |                                                  |                                                  |
| Tertile 1, ≤161.6468           | 1.0 (reference)        | 1.0 (reference)                                  | 1.0 (reference)                                  | 1.0 (reference)                                  | 1.0 (reference)                                  |
| Tertile 2, 161.6468 - 314.6356 | 0.9 (0.6 - 1.5)        | 0.9 (0.6 - 1.4)                                  | 0.9 (0.6 - 1.4)                                  | 0.9 (0.6 - 1.4)                                  | 0.9 (0.6 - 1.4)                                  |
| Tertile 3, 314.6356            | 1.1 (0.7 - 1.7)        | 1.1 (0.7 - 1.6)                                  | 1.0 (0.7 - 1.6)                                  | 1.0 (0.7 - 1.6)                                  | 1.0 (0.7 - 1.5)                                  |
| <b>NLPR</b>                    |                        |                                                  |                                                  |                                                  |                                                  |
| Tertile 1, ≤1.9151             | 1.0 (reference)        | 1.0 (reference)                                  | 1.0 (reference)                                  | 1.0 (reference)                                  | 1.0 (reference)                                  |
| Tertile 2, 1.9151 - 5.0605     | 1.5 (0.9 - 2.4)        | 1.4 (0.8 - 2.3)                                  | 1.4 (0.8 - 2.3)                                  | 1.4 (0.8 - 2.3)                                  | 1.3 (0.8 - 2.2)                                  |
| Tertile 3, >5.0605             | <b>2.8 (1.8 - 4.4)</b> | <b>2.6 (1.6 - 4.1)</b>                           | <b>2.5 (1.6 - 4.0)</b>                           | <b>2.5 (1.6 - 4.0)</b>                           | <b>2.4 (1.5 - 3.8)</b>                           |
| <b>SII-index</b>               |                        |                                                  |                                                  |                                                  |                                                  |
| Tertile 1, ≤869.43             | 1.0 (reference)        | 1.0 (reference)                                  | 1.0 (reference)                                  | 1.0 (reference)                                  | 1.0 (reference)                                  |
| Tertile 2, 869.43 - 2414.46    | 1.6 (1.0 - 2.6)        | 1.6 (1.0 - 2.5)                                  | 1.6 (1.0 - 2.6)                                  | 1.5 (1.0 - 2.5)                                  | 1.5 (0.9 - 2.4)                                  |
| Tertile 3, > 2414.46           | <b>1.8 (1.1 - 2.8)</b> | <b>1.7 (1.1 - 2.8)</b>                           | <b>1.7 (1.1 - 2.7)</b>                           | <b>1.6 (1.0 - 2.6)</b>                           | 1.6 (1.0 - 2.5)                                  |

Abbreviations: HR, Hazard Ratio; AKI, acute kidney injury; DNI, Delta neutrophil index; NLR, Neutrophil-to-lymphocyte ratio; MLR, Monocyte-to-lymphocyte ratio; SMR, Segmented neutrophil-to-monocyte ratio; PLR, Platelet-to-lymphocyte ratio; NLPR, Neutrophil-to-lymphocyte-platelet ratio; SII, Systemic immune-inflammation index

a. Correction made for: age, gender.

b. Correction made for: age, gender, comorbidity score, baseline renal function, immune status.

c. Correction made for: age, gender, comorbidity score, baseline renal function, immune status, medication use.

d. Correction made for: age, gender, comorbidity score, baseline renal function, immune status, medication use, disease severity, provisional diagnosis in the emergency department.

**Table S2.** HR's (95% CIs) for 14-day all-cause mortality.

| Ratios                         | Univariate             | Multivariate                                     |                                                  |                                                  |                                                  |
|--------------------------------|------------------------|--------------------------------------------------|--------------------------------------------------|--------------------------------------------------|--------------------------------------------------|
|                                | Crude HR<br>(95% CI)   | Adjusted HR:<br>Model 1 <sup>a</sup> (95%<br>CI) | Adjusted HR:<br>Model 2 <sup>b</sup> (95%<br>CI) | Adjusted HR:<br>Model 3 <sup>c</sup> (95%<br>CI) | Adjusted HR:<br>Model 4 <sup>d</sup> (95%<br>CI) |
| <b>Modified DNI</b>            |                        |                                                  |                                                  |                                                  |                                                  |
| Tertile 1, ≤0.5931             | 1.0 (reference)        | 1.0 (reference)                                  | 1.0 (reference)                                  | 1.0 (reference)                                  | 1.0 (reference)                                  |
| Tertile 2, 0.5931 - 2.7088     | <b>0.2 (0.1 - 0.6)</b> | <b>0.3 (0.1 - 0.7)</b>                           | <b>0.2 (0.1 - 0.7)</b>                           | <b>0.2 (0.1 - 0.6)</b>                           | <b>0.3 (0.1 - 0.7)</b>                           |
| Tertile 3, > 2.7088            | 1.0 (0.5 - 1.8)        | 1.0 (0.6 - 1.9)                                  | 1.1 (0.6 - 2.0)                                  | 1.1 (0.6 - 2.0)                                  | 1.0 (0.5 - 1.9)                                  |
| <b>NLR</b>                     |                        |                                                  |                                                  |                                                  |                                                  |
| Tertile 1, ≤4.2805             | 1.0 (reference)        | 1.0 (reference)                                  | 1.0 (reference)                                  | 1.0 (reference)                                  | 1.0 (reference)                                  |
| Tertile 2, 4.2805 - 10.2276    | 1.2 (0.5 - 2.7)        | 1.1 (0.5 - 2.4)                                  | 1.0 (0.5 - 2.4)                                  | 1.1 (0.5 - 2.5)                                  | 1.1 (0.5 - 2.4)                                  |
| Tertile 3, >10.2276            | <b>2.1 (1.0 - 4.3)</b> | 1.8 (0.9 - 3.7)                                  | 1.8 (0.9 - 3.8)                                  | 2.0 (1.0 - 4.1)                                  | 1.8 (0.8 - 3.7)                                  |
| <b>MLR</b>                     |                        |                                                  |                                                  |                                                  |                                                  |
| Tertile 1, ≤0.5057             | 1.0 (reference)        | 1.0 (reference)                                  | 1.0 (reference)                                  | 1.0 (reference)                                  | 1.0 (reference)                                  |
| Tertile 2, 0.5057 - 0.9830     | 0.7 (0.3 - 1.5)        | 0.6 (0.3 - 1.3)                                  | 0.6 (0.3 - 1.3)                                  | 0.6 (0.3 - 1.3)                                  | 0.5 (0.2 - 1.2)                                  |
| Tertile 3, >0.9830             | 1.3 (0.7 - 2.4)        | 1.1 (0.6 - 2.1)                                  | 1.1 (0.6 - 2.1)                                  | 1.2 (0.6 - 2.2)                                  | 1.0 (0.5 - 2.0)                                  |
| <b>SMR</b>                     |                        |                                                  |                                                  |                                                  |                                                  |
| Tertile 1, ≤6.7500             | 1.0 (reference)        | 1.0 (reference)                                  | 1.0 (reference)                                  | 1.0 (reference)                                  | 1.0 (reference)                                  |
| Tertile 2, 6.7500 -11.9633     | 2.1 (0.9 - 4.9)        | 1.9 (0.8 - 4.5)                                  | 1.9 (0.8 - 4.3)                                  | 1.8 (0.8 - 4.3)                                  | 1.8 (0.8 - 4.3)                                  |
| Tertile 3, >11.9633            | <b>2.7 (1.2 - 6.3)</b> | <b>2.6 (1.2 - 5.9)</b>                           | <b>2.6 (1.2 - 5.9)</b>                           | <b>2.7 (1.2 - 6.2)</b>                           | <b>2.3 (1.0 - 5.4)</b>                           |
| <b>PLR</b>                     |                        |                                                  |                                                  |                                                  |                                                  |
| Tertile 1, ≤161.6468           | 1.0 (reference)        | 1.0 (reference)                                  | 1.0 (reference)                                  | 1.0 (reference)                                  | 1.0 (reference)                                  |
| Tertile 2, 161.6468 - 314.6356 | 1.0 (0.4 - 2.3)        | 0.9 (0.4 - 2.2)                                  | 1.0 (0.4 - 2.2)                                  | 1.0 (0.4 - 2.3)                                  | 1.1 (0.5 - 2.5)                                  |
| Tertile 3, 314.6356            | <b>2.3 (1.1 - 4.7)</b> | <b>2.1 (1.0 - 4.2)</b>                           | 2.0 (1.0 - 4.0)                                  | 2.0 (1.0 - 4.1)                                  | 1.9 (0.9 - 3.9)                                  |
| <b>NLPR</b>                    |                        |                                                  |                                                  |                                                  |                                                  |
| Tertile 1, ≤1.9151             | 1.0 (reference)        | 1.0 (reference)                                  | 1.0 (reference)                                  | 1.0 (reference)                                  | 1.0 (reference)                                  |
| Tertile 2, 1.9151 - 5.0605     | <b>2.9 (1.2 - 6.8)</b> | <b>2.6 (1.1- 6.2)</b>                            | <b>2.6 (1.1 - 6.3)</b>                           | <b>2.9 (1.2 - 6.8)</b>                           | <b>2.6 (1.1 - 6.3)</b>                           |
| Tertile 3, >5.0605             | <b>2.9 (1.2 - 6.8)</b> | <b>2.5 (1.0 - 5.9)</b>                           | <b>2.7 (1.1 - 6.4)</b>                           | <b>3.0 (1.2 - 7.1)</b>                           | <b>2.6 (1.1 - 6.3)</b>                           |
| <b>SII-index</b>               |                        |                                                  |                                                  |                                                  |                                                  |
| Tertile 1, ≤869.43             | 1.0 (reference)        | 1.0 (reference)                                  | 1.0 (reference)                                  | 1.0 (reference)                                  | 1.0 (reference)                                  |
| Tertile 2, 869.43 - 2414.46    | 0.5 (0.2 - 1.2)        | 0.5 (0.2 - 1.1)                                  | 0.5 (0.2 - 1.1)                                  | 0.5 (0.2 - 1.2)                                  | 0.5 (0.2 - 1.2)                                  |
| Tertile 3, > 2414.46           | 1.9 (1.0 - 3.6)        | 1.7 (0.9 - 3.2)                                  | 1.6 (0.8 - 3.1)                                  | 1.7 (0.9 - 3.3)                                  | 1.5 (0.8 - 2.9)                                  |

Abbreviations: HR, Hazard Ratio; AKI, acute kidney injury; DNI, Delta neutrophil index; NLR, Neutrophil-to-lymphocyte ratio; MLR, Monocyte-to-lymphocyte ratio; SMR, Segmented neutrophil-to-monocyte ratio; PLR, Platelet-to-lymphocyte ratio; NLPR, Neutrophil-to-lymphocyte-platelet ratio; SII, Systemic immune-inflammation index

a. Correction made for: age, gender.

b. Correction made for: age, gender, comorbidity score, baseline renal function, immune status.

c. Correction made for: age, gender, comorbidity score, baseline renal function, immune status, medication use.

d. Correction made for: age, gender, comorbidity score, baseline renal function, immune status, medication use, disease severity, provisional diagnosis in the emergency department.
